# Supplementary figures and images for: Protective autophagy elicited by RAF→MEK→ERK inhibition suggests a treatment strategy for RAS-driven cancers
Source: Springer Nature journal article supplement (doi:10.1038/s41591-019-0367-9), 2019-03-04

**Ext. Fig. 7a**

**SC196**

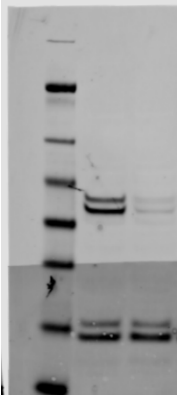

- pERK

- LC3

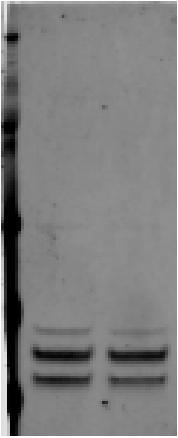

- tERK

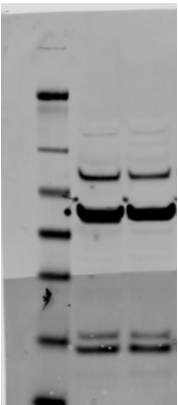

- p62

- Actin

- LC3

**SC274**

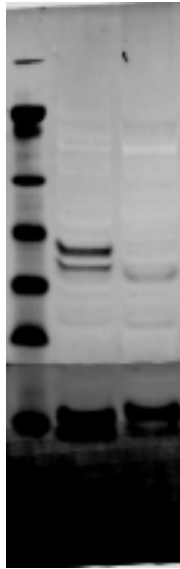

- pERK

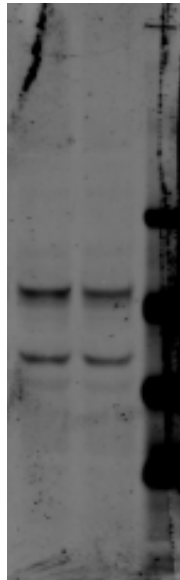

- tERK

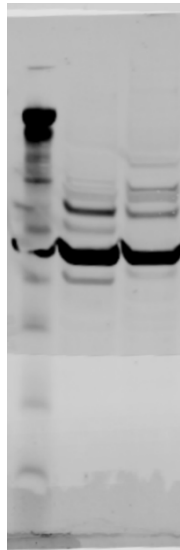

- p62

- Actin

**SC274**

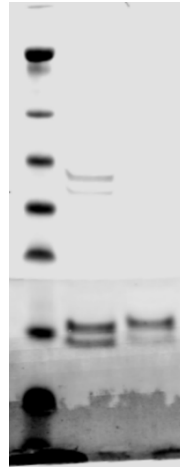

- LC3

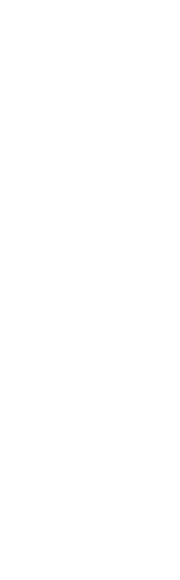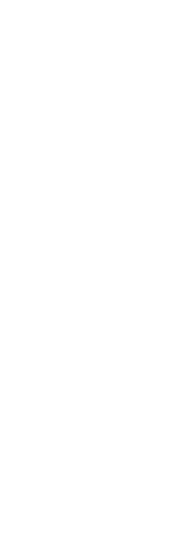

Supplement: 41591_2019_367_MOESM10_ESM.pdf [file 41591_2019_367_MOESM10_ESM.pdf]

**Fig. 1i**

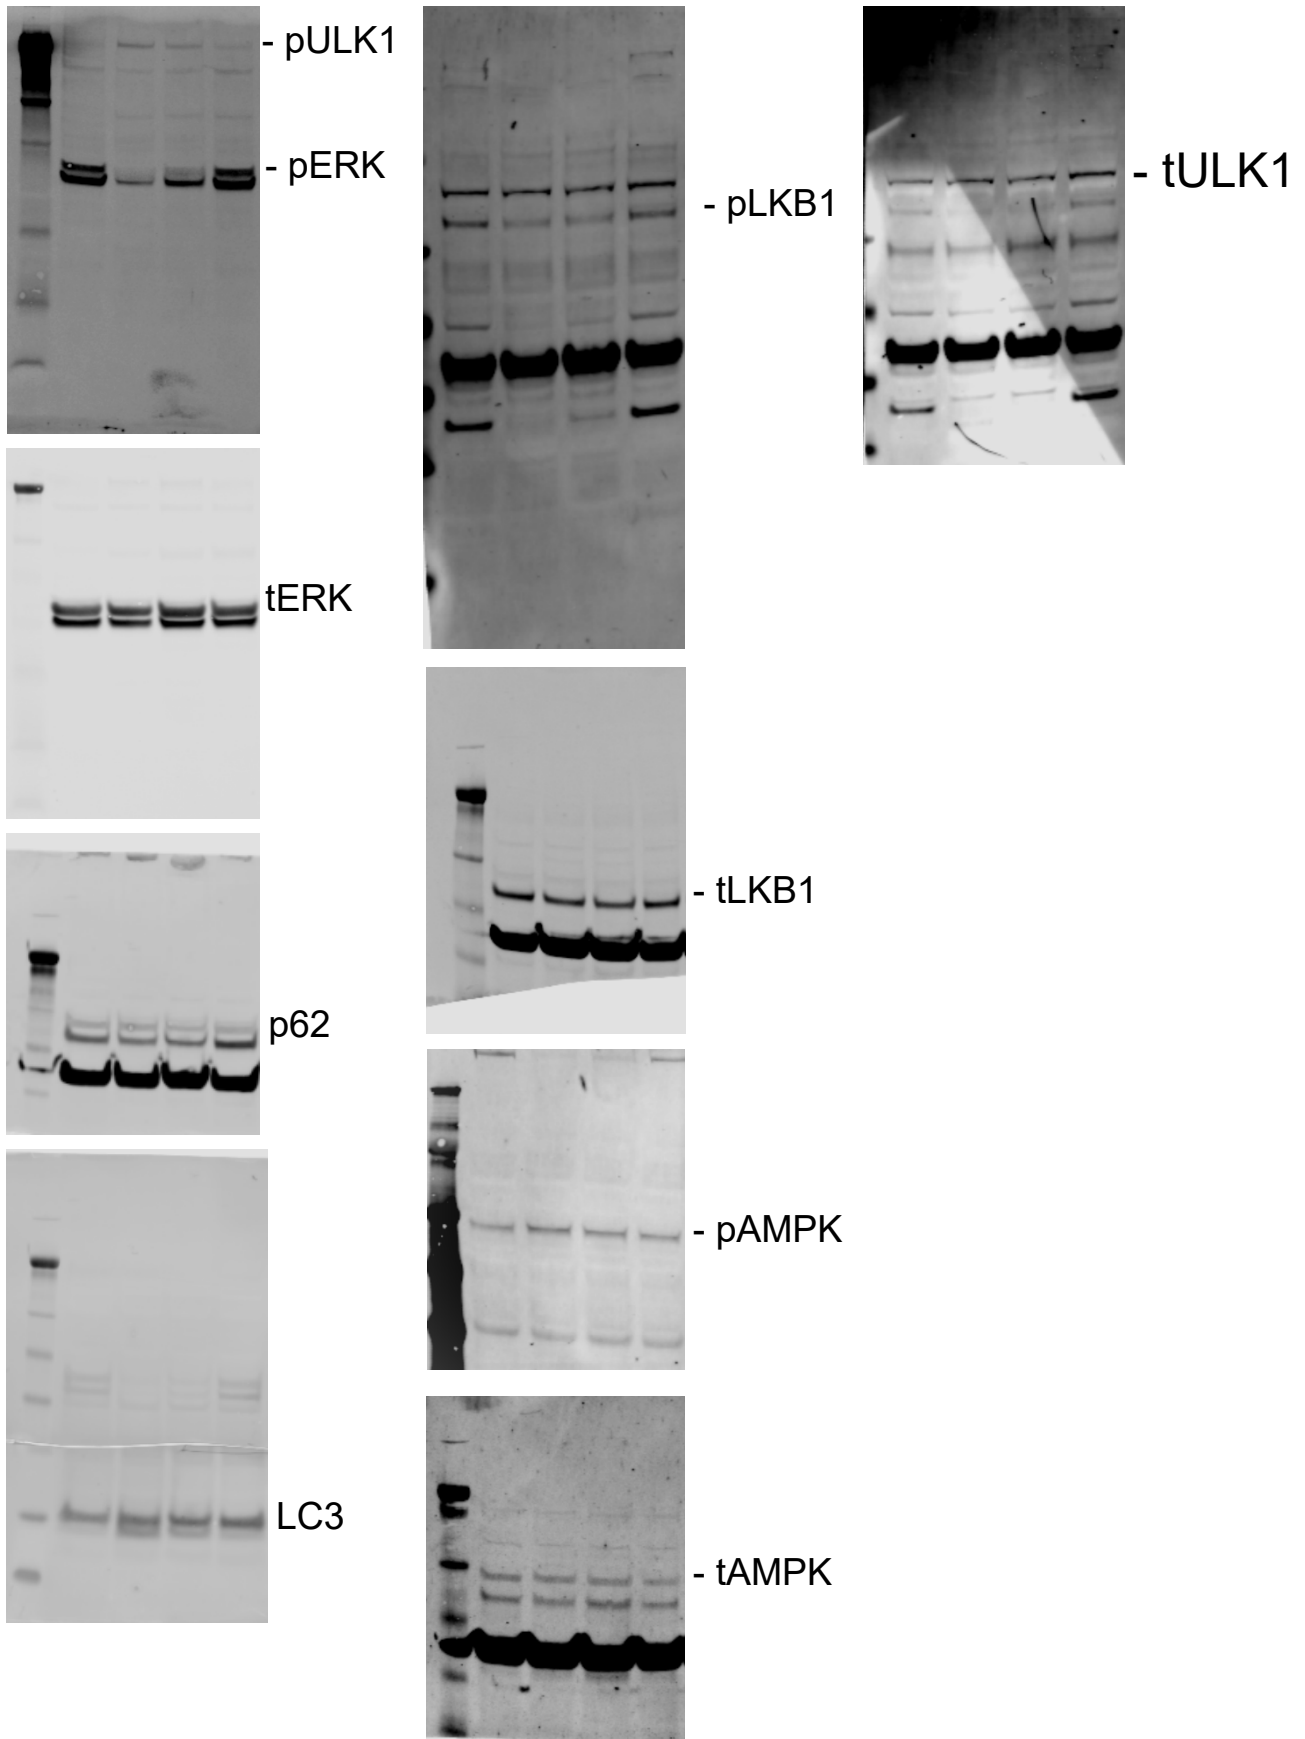

**Fig. 1j**

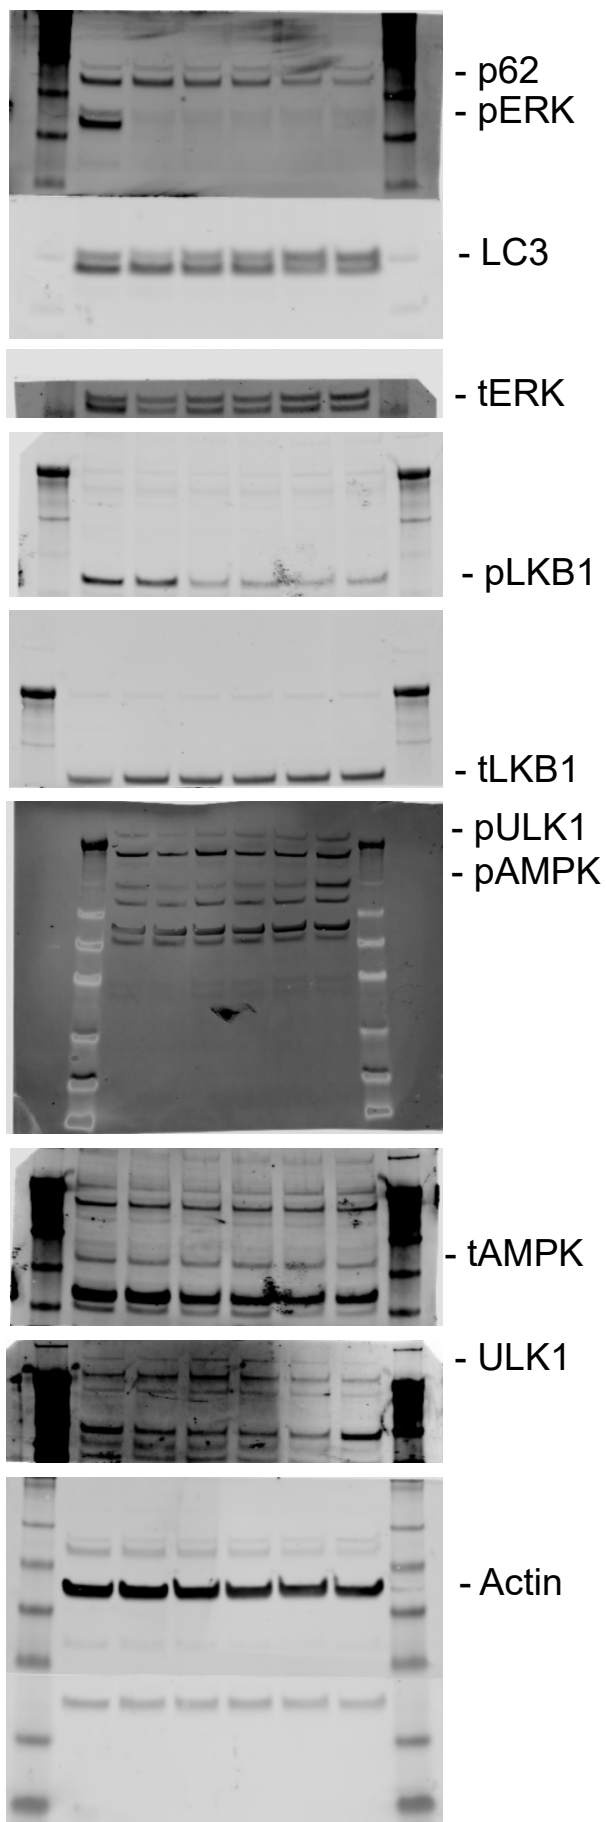

Supplement: 41591_2019_367_MOESM3_ESM.pdf [file 41591_2019_367_MOESM3_ESM.pdf]

**Fig. 3b**

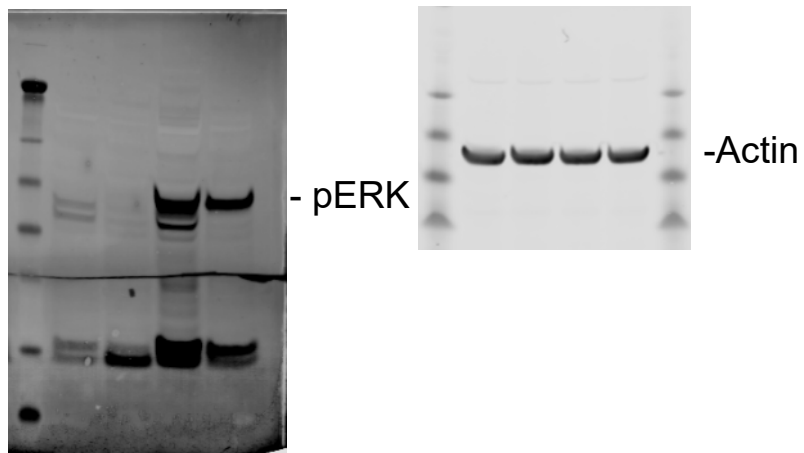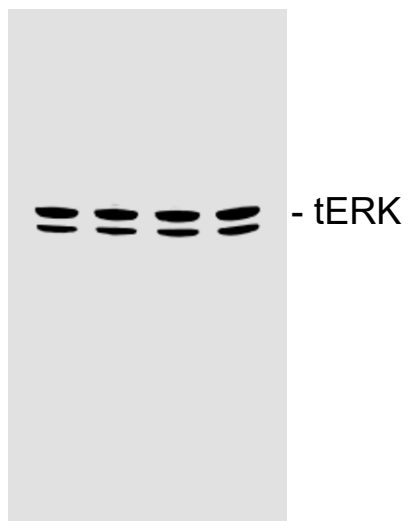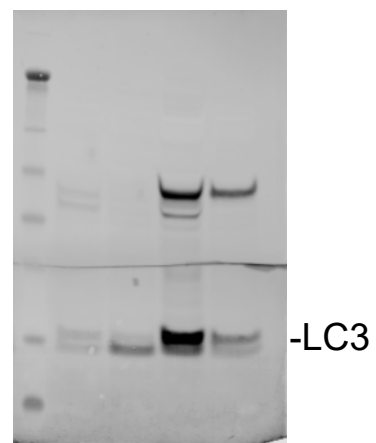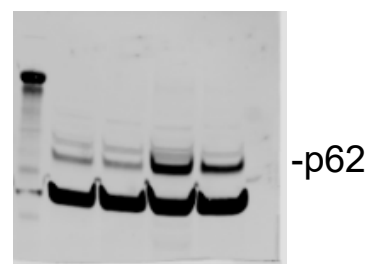

Supplement: 41591_2019_367_MOESM6_ESM.pdf [file 41591_2019_367_MOESM6_ESM.pdf]

# Ext. Fig. 2a

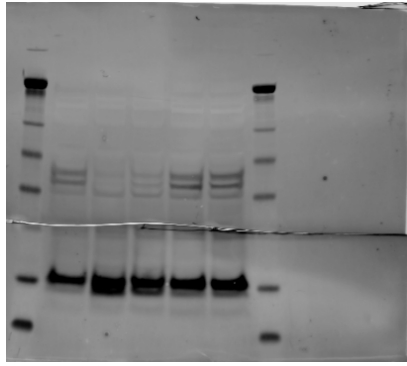

- pERK

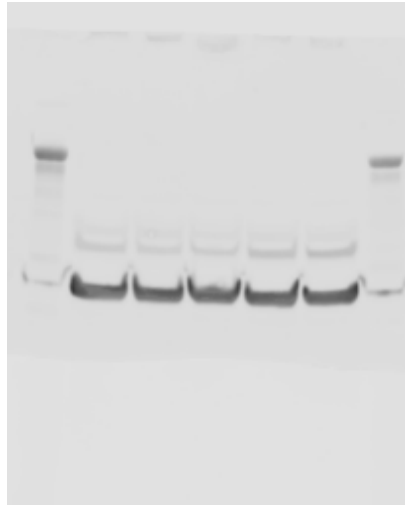

- Actin

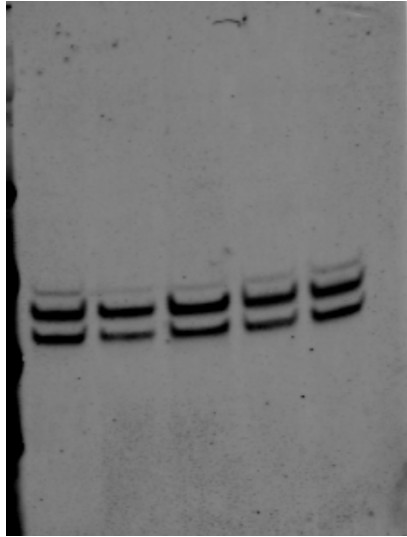

- tERK

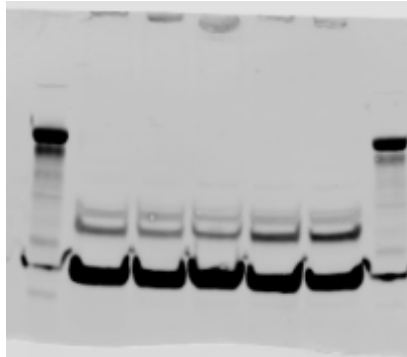

- p62

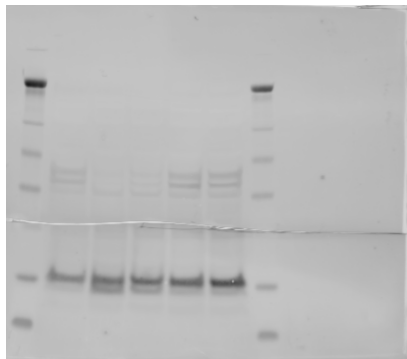

- LC3

**Ext. Fig. 2b**

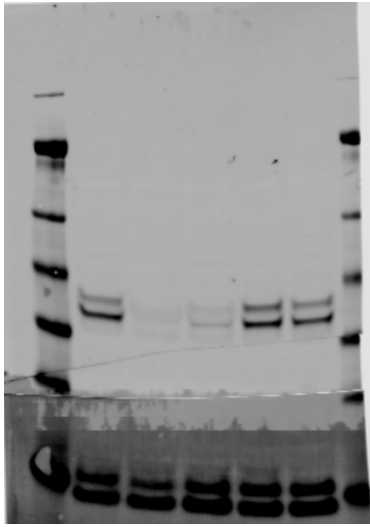

- pERK

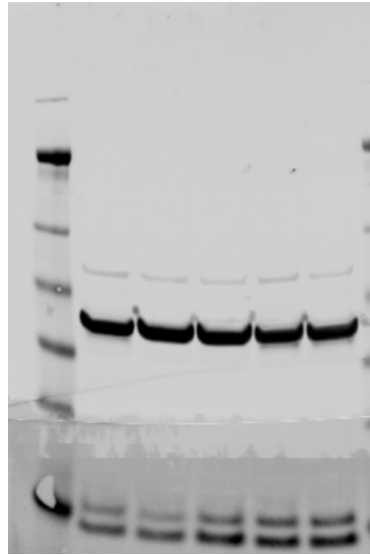

- Actin

- LC3

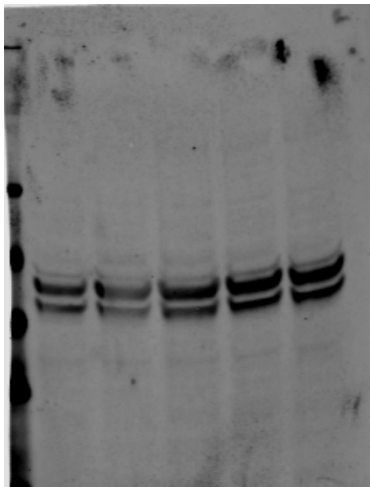

- tERK

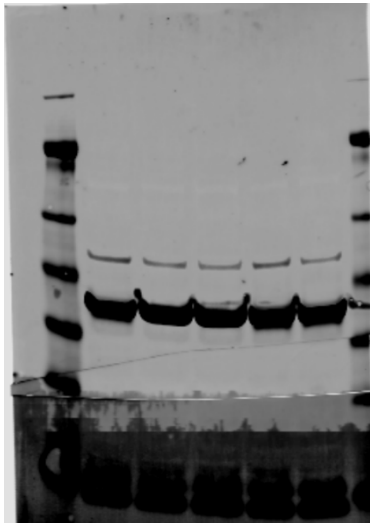

- p62

**Ext. Fig. 2c**

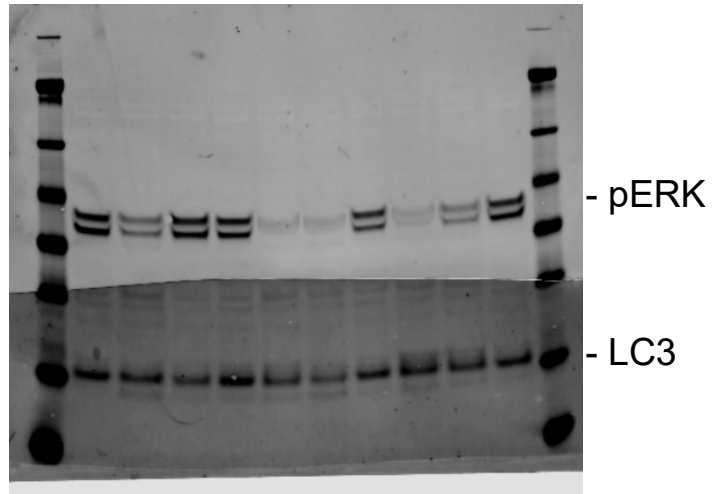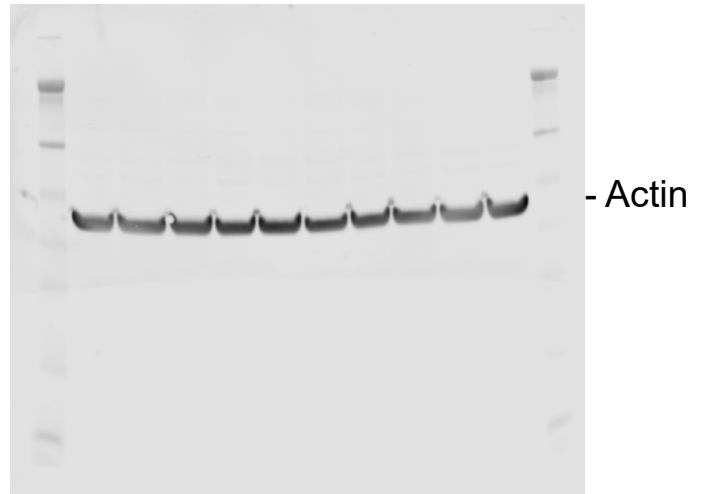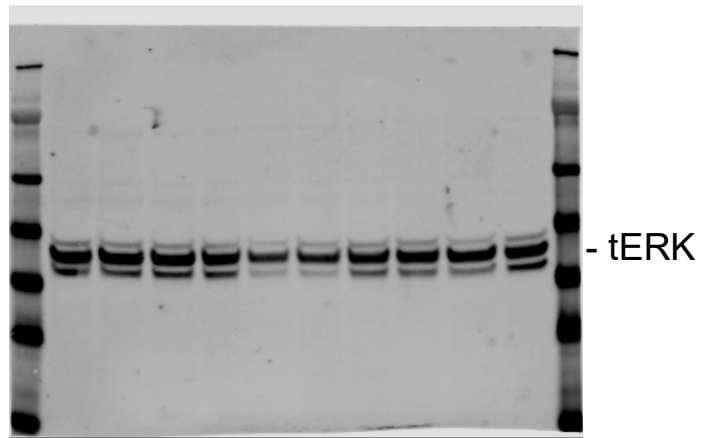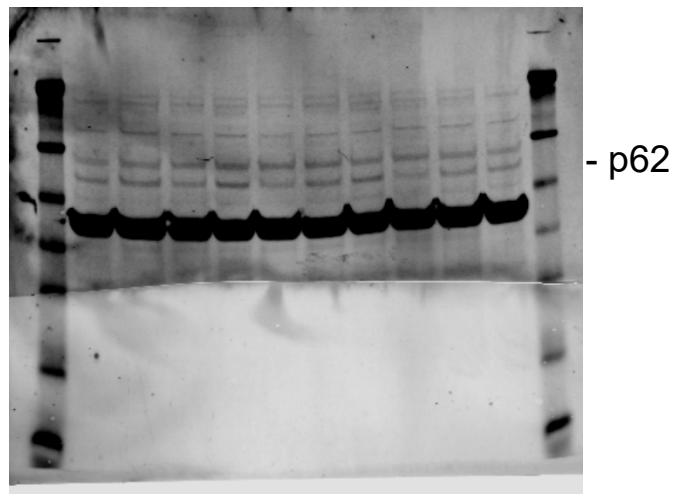

**Ext. Fig. 2d**

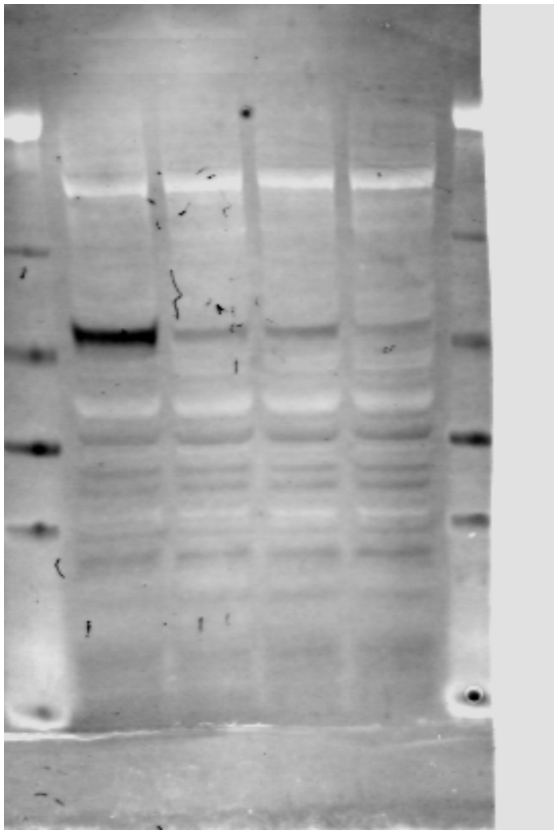

**Ext. Fig. 2e**

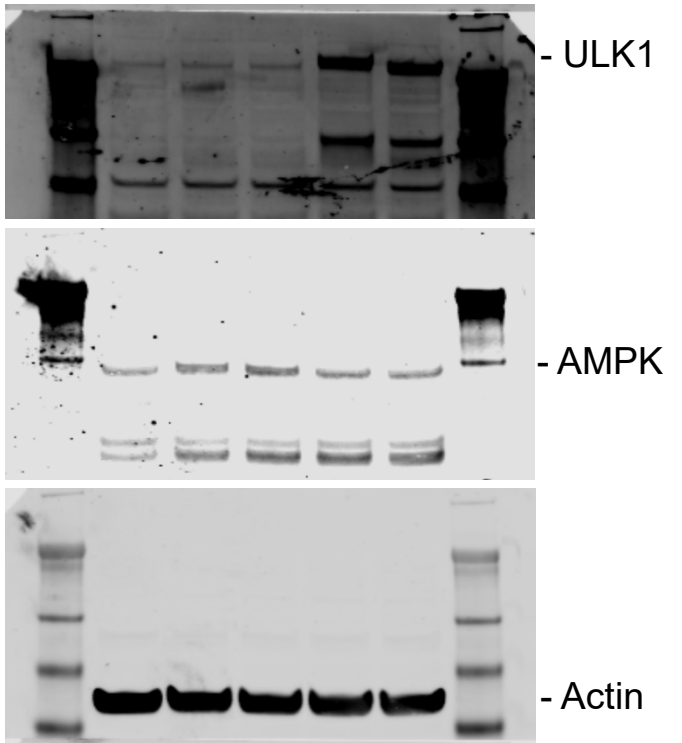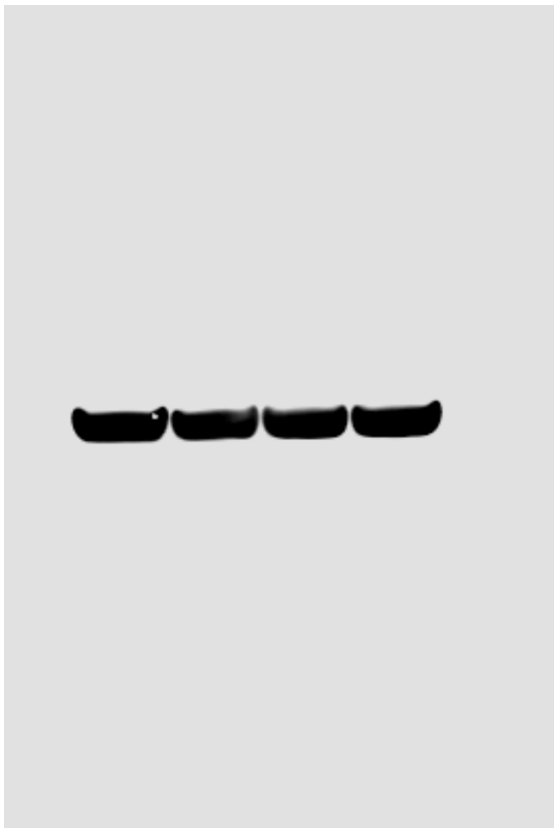

Supplement: 41591_2019_367_MOESM7_ESM.pdf [file 41591_2019_367_MOESM7_ESM.pdf]
